# Supplementary material for: Removing the Oxamyl from Aqueous Solution by a Green Synthesized HTiO2@AC/SiO2 Nanocomposite: Combined Effects of Adsorption and Photocatalysis
Source: MDPI journal article supplement (doi:10.3390/catal12020163), 2022-01-27
Supplement: s1 [file s1]

# Removing the Oxamyl from Aqueous Solution by a Green Synthesized HTiO<sub>2</sub>@AC/SiO<sub>2</sub> Nanocomposite: Combined Effects of Adsorption and Photocatalysis

Abeer El Shahawy <sup>1,\*</sup>, Ahmed H. Ragab <sup>2</sup>, Mahmoud F. Mubarak <sup>3,\*</sup>, Inas A. Ahmed <sup>2</sup>, Abdullah E. Mousa <sup>4</sup> and Dina M. D. Bader <sup>2</sup>

<sup>1</sup> Department of Civil Engineering, Faculty of Engineering, Suez Canal University, Ismailia 41522, Egypt

<sup>2</sup> Department of Chemistry, Faculty of Science, King Khalid University, Abha 62224, Saudi Arabia; ahrejab@kku.edu.sa (A.H.R.); eaahmed@kku.edu.sa (I.A.A.); ddeyaa@kku.edu.sa (D.M.D.B.)

<sup>3</sup> Petroleum Applications Department, Petroleum Research Institute (EPRI), 1 Ahmed El-Zomer St., Nasr City, Cairo 11727, Egypt

<sup>4</sup> Civil Engineering Department Faculty of Engineering, Suez Canal University, Ismailia 41522, Egypt; abdullah.elsayed.ali@gmail.com

\* Correspondence: abeer\_shahawi@eng.suez.edu.eg (A.E.S.); fathy8753@epri.sci.eg or fathy8753@yahoo.com (M.F.M.)

**Table S1.** Biosorption kinetics.

| The pseudo-first-order model                           | Plotting                 |               | $k_1$<br>$\text{min}^{-1}$                  | $q_e$<br>$\text{mg g}^{-1}$ | $R^2$ |
|--------------------------------------------------------|--------------------------|---------------|---------------------------------------------|-----------------------------|-------|
| Nonlinear: $q_t = q_e (1 - e^{-k_1 t})$                | $q_t$ vs $t$             | AC/Tio2-Dark  | 0.037                                       | 22.517                      | 0.730 |
|                                                        |                          | AC/Tio2-Light | 0.01                                        | 10.439                      | 0.959 |
| Linear: $\log(q_e - q_t) = \log(q_e) - k_1 t / \ln 10$ | $\log(q_e - q_t)$ vs $t$ | AC/Tio2-Dark  | 0.005                                       | 6.634                       | 0.926 |
|                                                        |                          | AC/Tio2-Light | 0.012                                       | 10.146                      | 0.886 |
| The pseudo-second-order model                          | Plotting                 |               | $K_2$<br>$\text{g mg}^{-1} \text{min}^{-1}$ | $q_e$<br>$\text{mg g}^{-1}$ | $R^2$ |
| Nonlinear: $q_t = k_2 q_e^2 t / (1 + k_2 q_e t)$       | $q_t$ vs $t$             | AC/Tio2-Dark  | 0.0003                                      | 24.138                      | 0.844 |
|                                                        |                          | AC/Tio2-Light | 0.0006                                      | 14.197                      | 0.938 |
| Linear: $t/q_t = 1/(k_2 q_e^2) + t/q_e$                | $t/q_t$ vs $t$           | AC/Tio2-Dark  | 0.002                                       | 25.853                      | 0.992 |
|                                                        |                          | AC/Tio2-Light | 0.0006                                      | 13.925                      | 0.858 |

**Table S2.** Diffusion model.

| Intraparticle diffusion model                                                                                          | Plotting                                        |               | $k_1$<br>$\text{mg g}^{-1} \text{min}^{-0.5}$ | $C$<br>$\text{mg g}^{-1}$                 | $R^2$ |
|------------------------------------------------------------------------------------------------------------------------|-------------------------------------------------|---------------|-----------------------------------------------|-------------------------------------------|-------|
| Nonlinear: $q = k_i t^{0.5} + C$                                                                                       | $q$ vs $t$                                      | AC/Tio2-Dark  | 1.039                                         | 0.00                                      | 0.793 |
|                                                                                                                        |                                                 | AC/Tio2-Light | 1.039                                         | 0.00                                      | 0.931 |
| Linear: $q = k_i t^{0.5} + C$                                                                                          | $q$ vs $t^{0.5}$                                | AC/Tio2-Dark  | 0.561                                         | 14.373                                    | 0.793 |
|                                                                                                                        |                                                 | AC/Tio2-Light | 0.630                                         | -0.051                                    | 0.931 |
| Pore diffusion model                                                                                                   | Plotting                                        |               | $k_p$<br>$\text{min}^{-0.5}$                  | $D_{ij}$<br>$\text{cm}^2 \text{min}^{-1}$ | $R^2$ |
| $\frac{q_t}{q_e} = F = \frac{6}{r_o} \left( -\frac{D_{ij} \cdot t}{\pi} \right)^{1/2} = k_p * t^{1/2}$                 | $\frac{q_t}{q_e}$ vs $t^{0.5}$                  | AC/Tio2-Dark  | 0.053                                         | 1.361E-08                                 | 0.875 |
|                                                                                                                        |                                                 | AC/Tio2-Light | 0.015                                         | 1.120E-09                                 | 0.938 |
| film diffusion model                                                                                                   | Plotting                                        |               | $k_{fd}$<br>$\text{min}^{-1}$                 | $D_{ij}$<br>$\text{cm}^2 \text{min}^{-1}$ | $R^2$ |
| $\ln \left( 1 - \frac{q_t}{q_e} \right) = - \left( \frac{D_{ij}}{r_o^2} \right) \cdot \pi^2 \cdot t = -k_{fd} \cdot t$ | $\ln \left( 1 - \frac{q_t}{q_e} \right)$ vs $t$ | AC/Tio2-Dark  | 0.007                                         | 6.211E-09                                 | 0.803 |
|                                                                                                                        |                                                 | AC/Tio2-Light | 0.002                                         | 4.544E-09                                 | 0.9   |
